# Supplementary material for: TGF-β1 Induces Immune Escape by Enhancing PD-1 and CTLA-4 Expression on T Lymphocytes in Hepatocellular Carcinoma
Source: PubMed Central journal article supplement (PMC8270637; doi:10.3389/fonc.2021.694145), 2021-06-25
Supplement: Image_1.pdf [file Image_1.pdf]

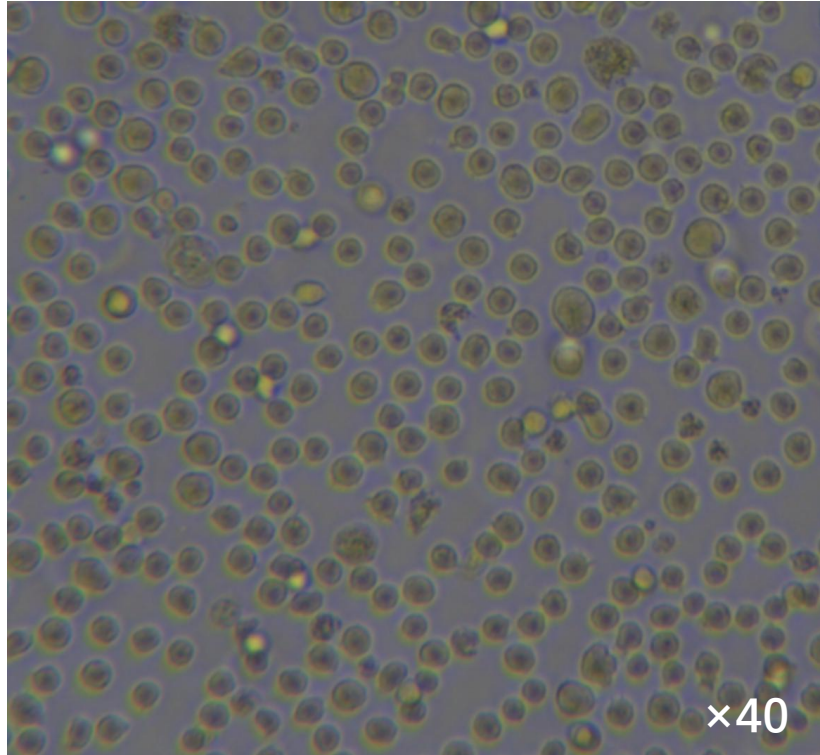

unactivated T cells

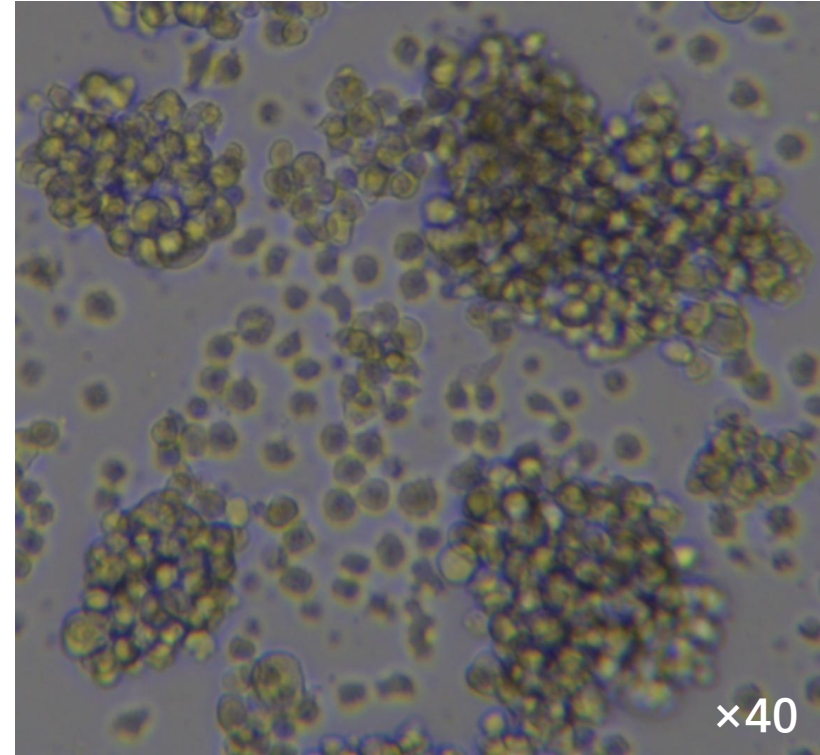

activated T cells

**Fig.S1 Treating T cells with  $\alpha$ CD3/CD28.** After treating H9 cells with  $\alpha$ CD3/CD28, H9 cells showed agglomeration, which is one of the phenomena that T cells are activated.

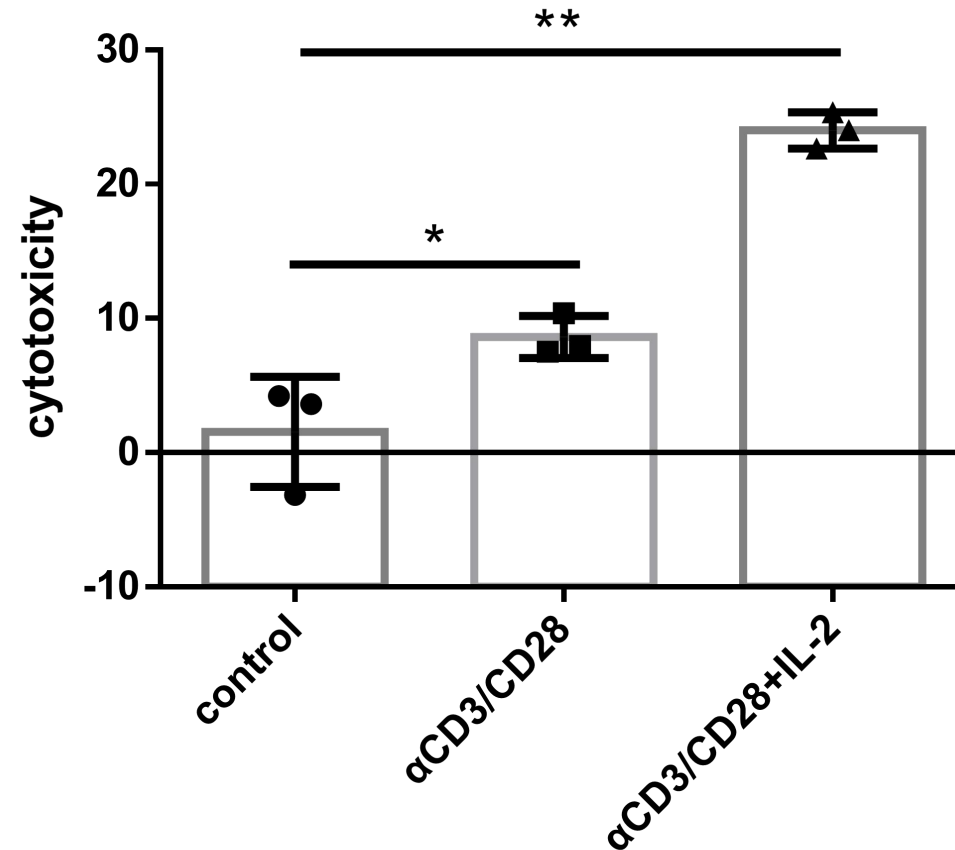

**Fig.S2 CCK-8 assay detects the cytotoxicity of T cells for 7721 cells.** We tested the cytotoxicity of H9 cells and found that the cytotoxicity of H9 cells for SMMC-7721 cells was significantly enhanced after treated with  $\alpha$ CD3/CD28. Furthermore, H9 cells treated with  $\alpha$ CD3/CD28 and IL-2 together had stronger cytotoxicity. Therefore, we consider that H9 cells can be activated as effector T cells with tumor-killing functions.

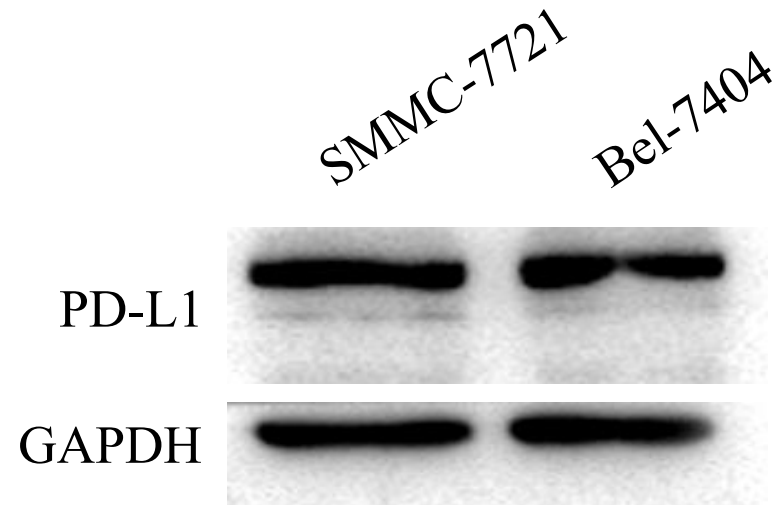

**Fig.S3 Western blot was used to detect the expression of PD-L1 protein of SMMC-7721 and Bel-7404 cells.**

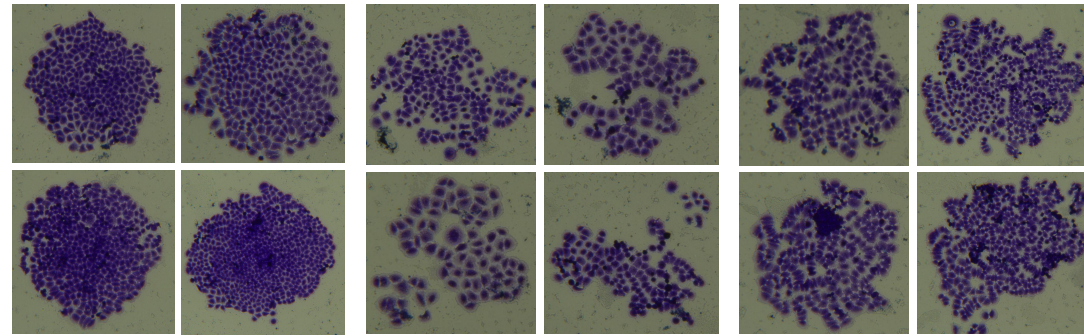

T cells

Activated T cells

Activated T cells  
+TGF- $\beta$ 1

**Fig.S4. The shape of clones of SMMC-7721 cells co-cultured with T cells.**
